# Supplementary material for: FRET investigation toward DNA tetrahedron-based ratiometric analysis of intracellular telomerase activity
Source: Royal Society of Chemistry journal article supplement (doi:10.1039/c9tb00001a), 2019-01-01
Supplement: c9tb00001a1.pdf [file c9tb00001a1.pdf]

## Supporting Information

### FRET investigation toward DNA tetrahedron-based ratiometric analysis of intracellular telomerase activity

Fanyu Meng,<sup>ab</sup> Hua Chai,<sup>ab</sup> Xiaoyi Ma,<sup>ab</sup> Yuguo Tang,<sup>a</sup> and Peng Miao<sup>\*ab</sup>

<sup>a</sup> Suzhou Institute of Biomedical Engineering and Technology, Chinese Academy of Sciences,  
Suzhou 215163, P. R. China

<sup>b</sup> University of Science and Technology of China, Hefei 230026, P. R. China

E-mail: miaopeng@sibet.ac.cn (P. Miao).

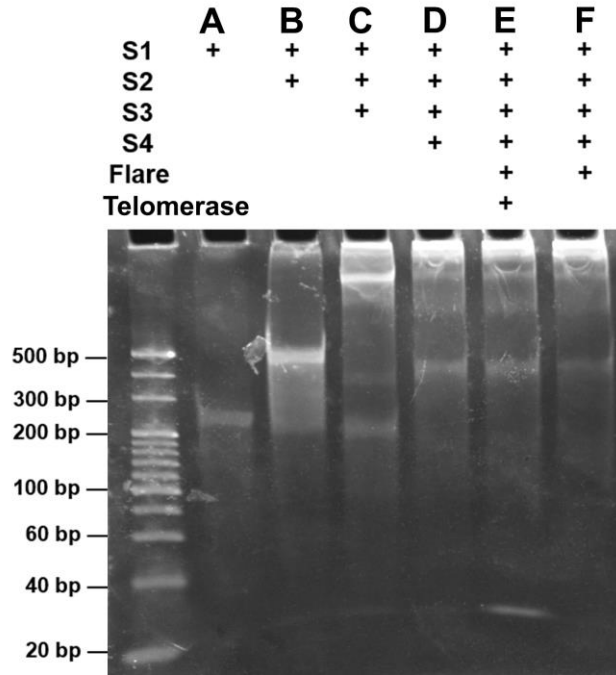

**Fig. S1** Gel electrophoresis analysis of six samples formed by different DNA probes. Lane A is strand S1; lane B is strand S1+S2; lane C is strand S1+S2+S3; lane D is strand S1+S2+S3+S4; lane E is strand S1+S2+S3+S4+Flare+telomerase; lane F is strand S1+S2+S3+S4+Flare.

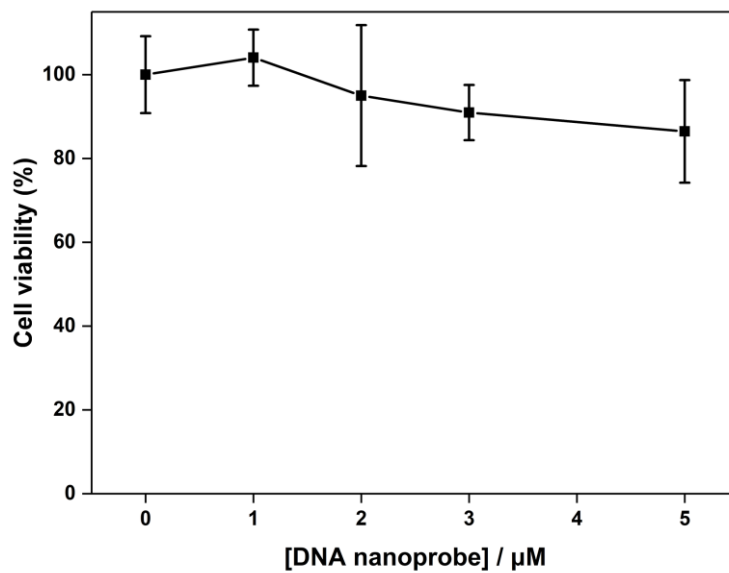

**Fig. S2** Cytotoxicity of different concentrations of DNA nanoprobe exposed to the cells for 24 h.

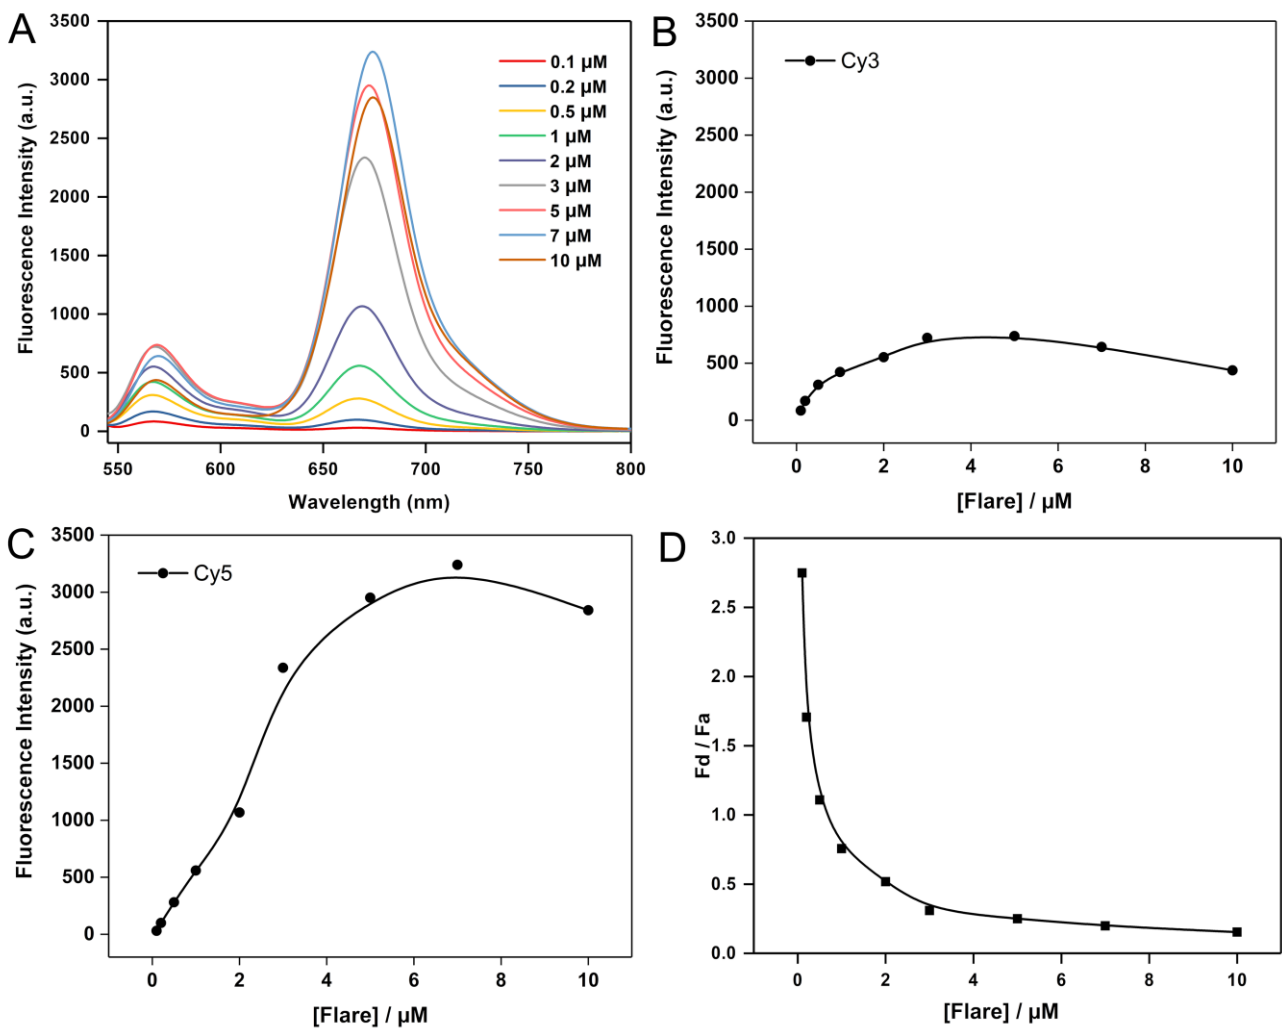

**Fig. S3** (a) Fluorescence spectra of Flare with different concentrations. (b) The relationship between peak intensity at 565 nm (Cy3) and Flare concentration. (c) The relationship between peak intensity at 662 nm (Cy5) and Flare concentration. (d) The relationship between the peak intensity ratio of donor to acceptor ( $F_d/F_a$ ) and Flare concentration.

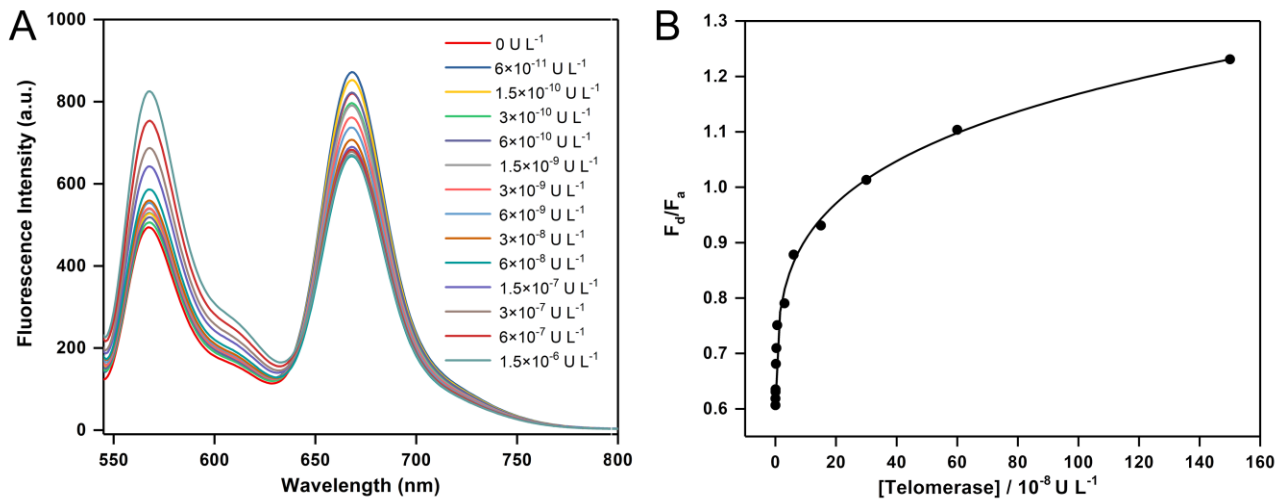

**Fig. S4** (A) Fluorescence responses in the presence of different concentrations of telomerase from the Kit. (B) Calibration curve reflecting the relationship between  $F_d/F_a$  and telomerase concentration.

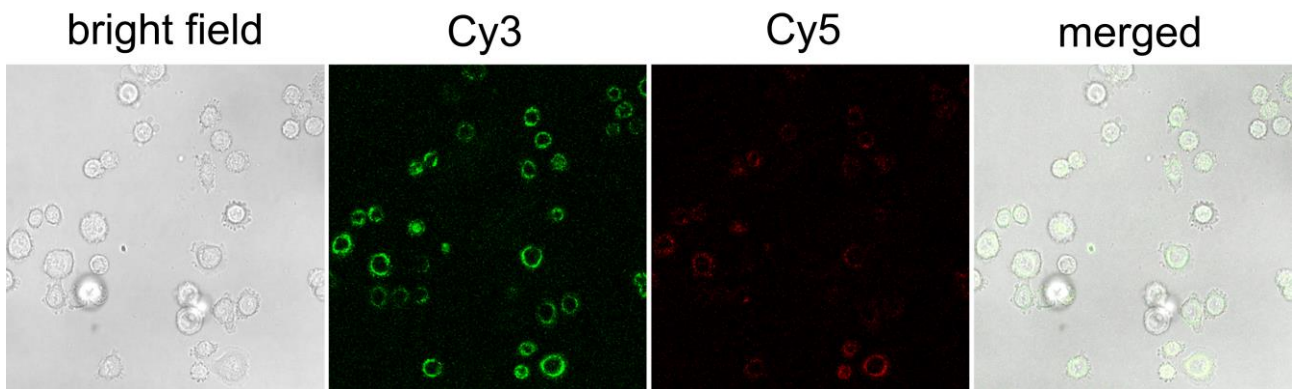

**Fig. S5** Confocal images of DNA nanoprobes delivered into SW480 cells.

**Table S1** DNA sequences used in this study.<sup>α</sup>

| Name  | Sequence (from 5' to 3')                                                                                                                                                     |
|-------|------------------------------------------------------------------------------------------------------------------------------------------------------------------------------|
| S1    | <u>ACATTCCTAAGTCTGAAGAAGAGCCGCCATAGTACCTCAGCC</u> <u>AACCCTAACCCT</u><br>A <u>AACCCTAACCCTAA</u> A <u>ACTCTGCTCGACGGATT</u> CCTTCCACGTAGTGTTCGTTATC<br>ACCAGGCAGTTGATTGCGCAA |
| S2    | ATGCGAGGGTCCAATACGCACCTGAGACGCGTTACGCATGACCCGA <u>ACTGGTCC</u><br>CGTCTACTTACCGGCGACAGTCGTTAAGCTGAAATTGCGCAATCAACTGCCTGG<br>TGATAACGACACTACGTGGGAA                           |
| S3    | ATTACAGCTTGCTACACCAACTAGAATGATCGGCTACAGACGAA <u>GGCTGAGGTA</u><br><u>CTATGGCGGCTCTTCTTCAGACTTAGGAATGT</u> CCTCAGCTTAACGACTGTCGCCG<br>GTAAGTAGACGGGACCAGTTC                   |
| S4    | CGTCTGTAGCCGATCATTCTAGTTGGTGTAGCAAGCTGTAATCCGTCATGCGTAA<br>CGCGTCTCAGGTGCGTATTGGACCCTCGCATCC <u>AATCCGTCGAGCAGAGTT</u>                                                       |
| Flare | Cy3-ATACAC <u>AGGGGG</u> CCAA <u>AGGGTT</u> TCTCAAT-Cy5                                                                                                                      |

<sup>α</sup>The underlined sequences are complementary with each other.
